# Supplementary material for: Covid-19 Related Generalized Anxiety Disorder Among Health Care Workers In A Hospital In The Greater Accra Region
Source: bioRxiv or medRxiv preprint supplement (doi:10.1101/2023.10.16.23297097), 2023-10-16
Supplement: Supplementary file [file media-1.pdf]

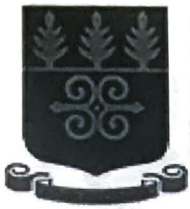

**UNIVERSITY OF GHANA  
MEDICAL SCHOOL  
DEPARTMENT OF COMMUNITY HEALTH**

September 14, 2020

**Student Name:** Ohakpougwu Chukwuebuka Emmanuel  
**Proposal Id:** UGMS-CHDRC/012/2020  
**Title:** COVID-19 Related Generalized Anxiety Disorder among Health Care Professionals in a Hospital in the Greater Accra Region.

**PROPOSAL AND ETHICAL APPROVAL**

The Community Health Department Review Committee (CHDRC) of the University of Ghana Medical School, has reviewed and given approval for the conduct of the above research by the final year Medical Student.

Progress of the research will be monitored and final output will be reviewed and assessed in partial fulfillment of the Final MBCh.B Examination of the Medical School.

Thank you.

Yours sincerely,

Prof. Alfred E. Yawson  
(The Chairman / Head of Department, Community Health)

Fdv
